# Supplementary material for: scMapNet: marker-based cell type annotation of scRNA-seq data via vision transfer learning with tabular-to-image transformations
Source: Research Square preprint supplement (doi:10.21203/rs.3.rs-6491865/v1), 2025-04-28
Supplement: Supplementary file 1 [file 620705fe68a1b86267c3b8c5.docx]

Supplementary Materials for

**scMapNet: marker****-based cell type annotation of scRNA-seq data via vision transfer learning with tabular-to-image transformations**

Zhe Yu, Ying Ye, Jianbo Pan

Corresponding author: Jianbo Pan, panjianbo@cqmu.edu.cn

**The PDF file includes:**

Tables S1 to S3

**Other Supplementary Materials for this manuscript include the following:**

Data S1 to S12

Table S1. The detailed information of benchmark datasets.

| Dataset | Organ | Experimental protocol | Number of cells | Number of cell types |
| --- | --- | --- | --- | --- |
| Baron | Pancreas | inDrop | 8569 | 14 |
| Lawlor | Pancreas | SMARTer | 617 | 7 |
| Segertolpe | Pancreas | Smart-Seq2 | 3514 | 11 |
| Muraro | Pancreas | CEL-Seq2 | 2126 | 9 |
| Xin | Pancreas | SMARTer | 1492 | 4 |
| PBMC68K | PBMC | 10X | 68579 | 11 |
| Myeloid | Myeloid | 10X | 71159 | 23 |

Table S2. The detailed datasets split information for cross-dataset evaluation.

| Reference Datasets | Query Dataset | Shared Cell Types | Reference Count | Query Count |
| --- | --- | --- | --- | --- |
| Lawlor,Muraro,  Segerstolpe,Xin | Baron | Acinar | 428 | 958 |
| Alpha | 2823 | 2326 |
| Beta | 1454 | 2525 |
| Delta | 381 | 601 |
| Ductal | 659 | 1077 |
| Endothelial | 37 | 252 |
| Epsilon | 10 | 18 |
| Mast | 7 | 25 |
| Gamma | 401 | 255 |
| Baron,Muraro,  Segerstolpe,Xin | Lawlor | Acinar | 1362 | 24 |
| Alpha | 4910 | 239 |
| Beta | 3715 | 264 |
| Delta | 957 | 25 |
| Ductal | 1708 | 28 |
| Gamma | 638 | 18 |
| Baron,Lawlor,  Segerstolpe,Xin | Muraro | Acinar | 1167 | 219 |
| Alpha | 4337 | 812 |
| Beta | 3531 | 448 |
| Delta | 789 | 193 |
| Ductal | 1491 | 245 |
| Endothelial | 268 | 21 |
| Epsilon | 25 | 3 |
| Gamma | 555 | 101 |
| Baron,Lawlor,Muraro,  Xin | Segerstolpe | Acinar | 1201 | 185 |
| Alpha | 4263 | 886 |
| Beta | 3709 | 270 |
| Delta | 868 | 114 |
| Ductal | 1350 | 386 |
| Endothelial | 273 | 16 |
| Epsilon | 21 | 7 |
| Mast | 25 | 7 |
| Gamma | 459 | 197 |
| Baron,Lawlor,Muraro,  Segerstolpe | Xin | Alpha | 4263 | 886 |
| Beta | 3507 | 472 |
| Delta | 933 | 49 |
| Gamma | 571 | 85 |

Table S3. Myeloid dataset split information for intra-dataset evaluation.

| Myeloid Reference Cancers | Myeloid Query Cancers | Shared Cell Types |
| --- | --- | --- |
| UCEC, PAAD, THCA, cDC2, KIDNEY, LYM | ESCA, MYE, OV-FTC | cDC1_CLEC9A |
| cDC2_CD1C |
| cDC2_CXCR4hi |
| cDC2_IL1B |
| cDC3_LAMP3 |
| Macro_INHBA |
| Macro_NLRP3 |
| Mast_KIT |
| Mono_CD16 |
| cDC2_CD1A |
| cDC2_CXCL9 |
| cDC2_FCN1 |
| cDC2_ISG15 |
| Macro_C1QC |
| Macro_LYVE1 |
| Macro_SPP1 |
| Mono_CD14 |
| pDC_LILRA4 |

Data S1. (separate file)

The source data of performance comparison between scMapNet and other competing methods in the intra-dataset scenario.

Data S2. (separate file)

The source data of performance comparison between scMapNet and other competing methods in the cross-dataset scenario.

Data S3. (separate file)

Top 100 important genes identified by aggregating model’s representation data based on attention score.

Data S4-12. (separate file)

Results of the enrichment analysis for the top attention genes derived from scMapNet.
