# Supplementary material for: scMapNet: marker-based cell type annotation of scRNA-seq data via vision transfer learning with tabular-to-image transformations
Source: Research Square preprint supplement (doi:10.21203/rs.3.rs-6491865/v1), 2025-04-28
Supplement: Supplementary file 3 [file advs.data_s2.xlsx]

## Sheet: Fig3.a
Dataset	scMapNet	SingleR	sciBet	Seurat	SCINA	TOSICA	scBERT
Baron	0.946	0.92	0.9612	0.957	0.5524	0.9454	0.914
Muraro	0.957	0.903	0.9589	0.957	0.7042	0.9143	0.95
Lawlor	0.985	0.9515	0.9766	0.962	0.9676	0.9883	0.9833
Segerstolpe	0.99	0.9782	0.9439	0.974	0.7207	0.9444	0.9226
Xin	0.982	0.937	0.9959	0.997	0.6214	0.9966	0.9839

## Sheet: Fig3.b
Dataset	scMapNet	singleR	sciBet	Seurat	TOSICA	scBERT
Baron	0.792883	0.795396	0.954321	0.852904	0.830888	0.714272
Muraro	0.899836	0.854223	0.95702	0.926194	0.846764	0.816712
Lawlor	0.933848	0.871957	0.927939	0.919689	0.96959	0.962319
Segerstolpe	0.975645	0.864258	0.784704	0.894618	0.928075	0.776696
Xin	0.924855	0.835329	0.989192	0.990063	0.989579	0.946671
