# Supplementary material for: scMapNet: marker-based cell type annotation of scRNA-seq data via vision transfer learning with tabular-to-image transformations
Source: Research Square preprint supplement (doi:10.21203/rs.3.rs-6491865/v1), 2025-04-28
Supplement: Supplementary file 4 [file advs.data_s3.xlsx]

## Sheet: Sheet1
Data S3. Top100 important genes of different cell types
acinar	alpha	beta	delta	ductal	endothelial	epsilon	gamma	mast
IL32	FTL	FTL	FTL	FTL	FTL	CD63	FTL	LAPTM5
FTL	CD63	CD63	CD63	CD63	SQSTM1	FTL	CD63	VIM
SQSTM1	CD99	CD99	SERF2	SQSTM1	CD63	ITGB1	SERF2	GATA2
CD63	SPINT2	SERF2	SSR4	SAT1	PECAM1	SERF2	CLU	FTL
P4HB	SSR4	P4HB	TIMP1	ITGB1	CD81	CLU	P4HB	RGS1
CD24	GCG	OAZ1	CLU	CD24	HSPB1	CD99	CD99	SQSTM1
GSTP1	SERF2	RPS27A	SPINT2	TPI1	CD93	SSR4	B2M	SRGN
HSPB1	CLU	SSR4	CST3	S100A11	ITGB1	B2M	CST3	IL4R
S100A11	CST3	SQSTM1	B2M	GSTP1	SERF2	HSPA5	SPINT2	CD63
SAT1	TPI1	HSP90B1	P4HB	HSPB1	B2M	RPS27A	RPS27A	CLU
CD44	HSPB1	SPINT2	RPS27A	SPINT2	VIM	TTR	TIMP1	PKM
SERF2	OAZ1	CST3	CD99	IL32	IFITM3	S100A6	TTR	RPS27A
KLK1	B2M	CCNI	SST	P4HB	TMSB4X	PKM	PPY	TMSB4X
TMEM258	RPS27A	TMEM258	SEC11C	ZFP36L1	CD59	DYNLL1	OAZ1	B2M
IFITM3	TTR	RPS15A	HSPA5	SOX4	IGFBP4	CD59	SQSTM1	TPSAB1
GP2	TIMP1	HSPA5	HSP90B1	SERF2	RPS27A	TMEM59	CD81	KIT
REG1A	ITGB1	B2M	RPS15A	B2M	TAGLN2	ACSL1	MALAT1	RPS15A
TAGLN2	PKM	TPI1	SQSTM1	TAGLN2	PLVAP	ITM2B	PKM	S100A6
ZFP36L1	CHGA	WDR83OS	CD81	PKM	ID3	RPS15A	FTH1	FTH1
B2M	WDR83OS	TUBA1B	CCNI	CD59	S100A11	CST3	HSPB1	OAZ1
TMSB4X	RPS15A	FTH1	OAZ1	CD44	DDX5	OAZ1	SSR4	CD22
MCL1	SQSTM1	RASD1	FTH1	RPS27A	RHOA	SQSTM1	FXYD2	CTSD
RPS27A	CYSTM1	TTR	TUBA1B	TMSB4X	SOX4	TAGLN2	CCNI	CD9
PRSS2	TMBIM6	CHGA	HSPB1	SDC4	CALR	CALM1	PAX6	TAGLN2
TPI1	TUBA1B	HSP90AA1	TMEM258	IFITM3	PPIA	TSTD1	FOS	INS
RPS15A	FTH1	SURF4	TMBIM6	HSPA5	ETS1	CALR	TMBIM6	GLUL
OAZ1	ALDH1A1	TAGLN2	CHGA	CD81	HSPA5	FTH1	RPS15A	RPL28
SSR4	TAGLN2	ENO1	TMSB4X	CCNI	PRSS23	GABARAPL1	GABARAP	ALOX5AP
PPIA	ITM2B	CALM1	S100A6	TACSTD2	RPS15A	CD81	RHOA	AHNAK
PRSS1	CCNI	CD81	HSP90AA1	APLP2	LGALS1	GPX4	LGALS3BP	CD81
CEBPD	MALAT1	TMBIM6	MALAT1	RPS15A	GPX1	SPINT2	GRN	PPIA
SNHG8	CD81	RPL28	TAGLN2	S100A6	FTH1	CHCHD2	ITM2B	ARHGDIB
CLDN7	HSP90AA1	FKBP2	FKBP2	LCN2	ITM2B	FKBP2	TPI1	S100A11
MT2A	TMEM258	TIMP1	TTR	TMBIM6	GSTP1	GSTP1	HSP90AA1	RPSA
SLC3A2	MYL6	INS	CHCHD2	PPIA	TUBA1B	MYL6	HMGN2	SAMSN1
SYCN	BSG	PPIA	PKM	LMNA	CD9	SCARB2	MYL6	RPL13A
SERPINA3	DYNLRB1	ITM2B	GABARAP	MCL1	PXDN	SERPINA1	CHGB	CD44
FTH1	RPL28	CHCHD2	TUBA1A	CTSD	FKBP1A	SST	CHGA	MS4A2
CHCHD2	SLC7A2	PKM	APLP2	OAZ1	CXCR4	DSTN	DYNLRB1	NDRG2
TMBIM6	RHOA	SCGN	CHGB	CLDN7	SPARC	LGALS3BP	ALDH1A1	RPL7
UGDH	PPIA	PARM1	GPX4	ENO1	KDR	TUBA1B	ITGB1	RPLP1
WDR83OS	GRN	GABARAP	CALR	TM4SF1	IGFBP7	ITM2C	PEG10	RPS14
CD59	TMEM176A	TUBA1A	DYNLL1	TMED9	OAZ1	PFN2	CPE	RPL10A
CCNI	CALM1	IAPP	SCGN	CLDN4	TPI1	INS	RPL28	CD37
CST3	P4HB	RHOA	INS	CALR	IL32	CYSTM1	SST	TMBIM6
KRT18	CHCHD2	HSP90AB1	MYL6	TMEM258	TM4SF1	HSPB1	CALM1	SST
CIB1	GABARAP	LAPTM4A	WDR83OS	HSP90AA1	PRDX1	PSMB1	CALR	TUBA1B
NPM1	HSP90AB1	DSTN	RHOA	FTH1	LAPTM4A	RPL28	AQP3	S100A4
ZFAS1	SCGN	CPE	TMEM59	TSPAN3	APP	FGF14	HSP90AB1	RPS24
TM4SF1	FKBP2	MYL6	RPL28	ELF3	MARCKSL1	TMBIM6	WDR83OS	RPS28
PSMB1	TMSB4X	DYNLL1	CPE	KRT18	ACTG1	MALAT1	TUBA1B	RPL37A
ENO1	CHGB	ERO1B	CALM1	HSP90B1	TMBIM6	GABARAP	ACTG1	RPL27A
YBX3	GPX3	TMEM59	DSTN	RHOA	CTSD	HMGN2	TUBA1A	RPL35A
SDC4	CPE	CALR	CYSTM1	JUP	PSMB1	TMEM258	BSG	RPL37
SOX4	RHBDD2	KDELR2	HSP90AB1	CHCHD2	HSP90B1	P4HB	CD59	RPL18A
KRT8	ERP29	NAP1L1	ITGB1	JUN	APLP2	TMED9	PPIA	LAPTM4A
HSP90AA1	DSTN	PSMB1	PPIA	KRT19	HSP90AA1	PARK7	RPL13A	RPL11
RNASE1	ACTG1	GPX4	TPI1	HMGN1	RPL28	RHOA	INS	CPA3
SPINT2	TUBA1A	APLP2	ACTG1	KRT8	TIMP1	DDX5	SCG2	ITM2B
COX5A	CD59	RPL22	GSTP1	RPL28	INS	IAPP	TMEM176A	RPLP0
TUBB	FOS	TMED9	SCARB2	CDKN1A	GRN	CPE	RPL11	ZFP36
CD81	TSPAN3	HNRNPC	HMGN2	MYL6	GSTO1	CAPZB	DSTN	RPS9
CPA1	RPL13A	MALAT1	DYNLRB1	S100A10	GNAI2	SCGN	PARM1	RPS4X
VIM	SURF4	DYNLRB1	RPL35	VMP1	MYL6	PPIA	RPS14	RPS3
RHOA	SNHG8	RPL13A	RPL13A	KRT7	ITGA5	KRT8	RPLP1	RPS2
LMNA	GPX4	RPL35	GPX3	WDR83OS	RPL13A	WDR83OS	RHBDD2	RPL3
PLP2	INS	SNHG8	MTCH1	LAPTM4A	RPLP1	ACTG1	HSP90B1	RPS21
SPINK1	TMEM176B	TUBB	LAPTM4A	CST3	HSP90AB1	GRN	DDX5	RPL38
PNLIPRP2	RPL22	RPLP0	FOS	PGK1	PODXL	RPL7	ID2	RPL32
MGST1	RPLP0	SPCS1	RPLP0	LITAF	CHCHD2	HSP90AA1	RPLP0	ACTG1
TUBA1B	RPL35	SEC11C	RPLP1	PRDX1	P4HB	TIMP1	TMED9	RPS6
GAS5	PARM1	SST	RPL11	ITM2B	SERPINE1	TMEM176A	TMEM258	RPS16
CTRB1	RPL11	RPSA	ITM2B	DSTN	CD99	MCL1	DYNLL1	TYROBP
CELA3A	MAFB	ACTG1	DDX5	DYNLL1	ENG	P4HTM	CALM3	SAT1
CTRB2	LMNA	VEGFA	RPS14	CYSTM1	RPS14	RPS3A	SEC11C	RPS3A
MYL6	RPLP1	RPLP1	GCG	KLF6	RPL11	RPS14	S100A6	LITAF
CELA3B	CALR	RPL7	EPCAM	DDX5	TUBB	RPL10A	RPL35	RGS10
KDELR2	TMEM59	RPS14	KDELR2	NAP1L1	TMEM258	RPLP1	RPL7	DDX5
PLA2G1B	RPS11	RPL11	RPS3A	HSP90AB1	RPS28	HMGN1	CYSTM1	GPX4
MYDGF	RPSA	TSPAN3	RPSA	GRN	CALM1	EPCAM	NAP1L1	RPS5
ACTG1	RPS14	RPS11	GRN	ACTG1	NFKBIA	CHGB	RPL37A	DDIT4
CLPS	DDX5	RPL37A	RPL7	CIB1	HNRNPK	MYDGF	SCGN	HSP90AB1
RPL28	RPL37A	RPL27A	VMP1	HNRNPC	HMGB1	MTCH1	HSPA5	RPL30
DDX5	HSP90B1	ARF4	ENO1	TUBB	RPL35	UQCRQ	RPL27A	RPL34
CPA2	ENO1	RPS28	RPL10A	MTCH1	RPL10A	HSP90AB1	RPS3A	RPL39
TSPAN3	RPL27A	RPS24	TUBB	ZFAS1	ENO1	JUN	RPSA	TPT1
ITGB1	RPS28	CIB1	SERPINA1	HMGA1	RPS24	GHRL	JUND	RPL14
TMED9	RPS24	ITGB1	RPL27A	LGALS3BP	RPL37A	WSB1	RPS28	RPS20
CTRC	COX8A	MYDGF	RPL37A	MYDGF	SOCS3	OS9	RASD1	RAC2
HSPA5	LRPAP1	RPS3A	PSMB1	GABARAP	IFITM1	RPSA	APLP2	FOXP1
HSP90AB1	MTCH1	PAX6	RPS24	SSR4	HNRNPC	RPL11	RPS24	RPS25
CPB1	RPS16	RPS19	COX8A	CSTB	CSTB	RPL13A	PTP4A3	CD99
PNLIPRP1	HSPA5	RPS25	RPS28	RPS11	CDKN1A	RPLP0	COX8A	RPS19
GABARAP	RPS19	COX4I1	RPL22	RPL22	RPS16	CCNI	LAPTM4A	NPM1
PRSS3	TMED9	RPL37	PRKAR1A	NAMPT	PIM3	SCG2	RPL37	BHLHE40
CELA2A	RPS3A	RPS16	GNAS	EPCAM	TMED9	TPI1	TMEM59	RPS10
RPL35	RPL18A	MTCH1	SLC3A2	LGALS3	RPLP0	DYNLRB1	CHCHD2	SH3BGRL3
CLDN4	PSMB1	CYSTM1	RPS19	RPL35	RPL27A	POLR2L	COX4I1	RPL5
HMGA1	TUBB	RPL32	RPL18A	FOS	SST	TUBA1A	HMGN1	USF2
PNLIP	SCARB2	CHGB	RPL32	HNRNPK	GABARAP	COX5A	GNAS	DUSP6
