# Supplementary material for: scMapNet: marker-based cell type annotation of scRNA-seq data via vision transfer learning with tabular-to-image transformations
Source: Research Square preprint supplement (doi:10.21203/rs.3.rs-6491865/v1), 2025-04-28
Supplement: Supplementary file 5 [file advs.data_s4_to_s12.xlsx]

## Sheet: data S4
Data S4: enrich analysis of acinar cell
Term	Overlap	P-value	Adjusted P-value	Odds Ratio	Combined Score	Genes
Acinar cells	22/48	1.28392e-32	6.93314e-31	131.789	9677.64	PLA2G1B;SERPINA3;CTRB1;KLK1;CELA3B;SPINK1;SYCN;PRSS1;CPB1;CLPS;PRSS3;REG1A;CTRB2;CPA2;PRSS2;RNASE1;CELA3A;CTRC;PNLIP;PNLIPRP1;CELA2A;CPA1
Luminal epithelial cells	5/48	0.000176524	0.00476614	12.0797	104.393	KRT18;CLDN4;CEBPD;HMGA1;KRT8
Merkel cells	2/16	0.0135303	0.137023	15.5372	66.8539	KRT18;KRT8
Hepatoblasts	2/17	0.0152248	0.137023	14.5314	60.8115	KRT18;KRT8
Foveolar cells	2/21	0.0228457	0.176238	11.5398	43.6088	PLA2G1B;CLPS
Mammary epithelial cells	3/43	0.0121386	0.137023	7.90694	34.8804	CLDN4;KRT18;KRT8
Decidual cells	1/10	0.107372	0.362379	13.9517	31.1327	IL32
Erythroblasts	2/26	0.0341184	0.230299	9.17401	30.989	ITGB1;CD44
Embryonic stem cells	4/83	0.0136826	0.137023	5.24425	22.5064	CD59;LMNA;ITGB1;CD24
Parietal cells	1/14	0.147083	0.451865	9.80871	18.8009	CD24
Peri-islet Schwann cells	1/16	0.166284	0.451865	8.53908	15.3196	PNLIPRP1
Bergmann glia	2/41	0.0774202	0.324261	5.67022	14.5073	ITGB1;VIM
Epiblast cells	1/17	0.175725	0.451865	8.01968	13.9449	CLDN7
Cholangiocytes	2/42	0.0807221	0.324261	5.52891	13.9149	CLDN4;CD24
Paneth cells	2/42	0.0807221	0.324261	5.52891	13.9149	PRSS1;PNLIPRP2
Principal cells	2/42	0.0807221	0.324261	5.52891	13.9149	KLK1;CLDN4
Ductal cells	2/43	0.0840677	0.324261	5.39442	13.3573	CLDN4;SERPINA3
Epsilon cells	2/45	0.0908841	0.327183	5.14398	12.3361	SPINK1;KRT8
Hematopoietic stem cells	3/88	0.0760376	0.324261	3.70578	9.54804	CD59;CD44;MGST1
Natural killer T cells	1/23	0.230212	0.546663	5.87285	8.62578	CD44
Airway goblet cells	1/25	0.247578	0.546663	5.39091	7.52588	GP2
Peritubular myoid cells	1/25	0.247578	0.546663	5.39091	7.52588	RNASE1
Glomus cells	1/28	0.272909	0.55414	4.79944	6.23263	VIM
Gamma delta T cells	2/66	0.170209	0.451865	3.45206	6.11267	TUBB;TUBA1B
Microfold cells	1/30	0.289331	0.55414	4.47196	5.54605	GP2
Epithelial cells	3/127	0.171564	0.451865	2.52135	4.44464	KLK1;SYCN;CD24
Goblet cells	1/35	0.328811	0.572768	3.81936	4.24817	KLK1
Plasma cells	2/86	0.253085	0.546663	2.62255	3.60346	CD24;SSR4
Melanocytes	1/40	0.366141	0.599139	3.33198	3.34777	HSPB1
Distal tubule cells	1/42	0.380496	0.60252	3.16992	3.06302	KLK1
T cells	2/95	0.291029	0.55414	2.36504	2.91925	IL32;CD81
B cells	2/98	0.303654	0.55414	2.28988	2.72924	CD24;HMGA1
Kupffer cells	1/45	0.401434	0.60252	2.95413	2.69627	FTL
Monocytes	2/99	0.307855	0.55414	2.26586	2.66946	CD44;IFITM3
Megakaryocytes	1/48	0.421678	0.60252	2.7656	2.38813	CIB1
Keratinocytes	1/48	0.421678	0.60252	2.7656	2.38813	CD24
Osteoclasts	1/49	0.428276	0.60252	2.70794	2.2963	ITGB1
Muller cells	1/51	0.441251	0.60252	2.59947	2.12673	CD44
Plasmacytoid dendritic cells	1/55	0.466342	0.60252	2.40641	1.8357	KLK1
Basal cells	1/56	0.472441	0.60252	2.3625	1.7715	PLP2
Ependymal cells	1/56	0.472441	0.60252	2.3625	1.7715	TM4SF1
Endothelial cells	3/187	0.353743	0.596942	1.67692	1.74263	KLK1;RNASE1;TM4SF1
Pericytes	1/62	0.507622	0.60252	2.12899	1.44349	VIM
Astrocytes	1/63	0.513258	0.60252	2.09443	1.39694	VIM
Osteoblasts	1/63	0.513258	0.60252	2.09443	1.39694	CD44
Neutrophils	1/69	0.545769	0.619849	1.90827	1.15557	CD24
Enterocytes	2/142	0.480045	0.60252	1.55628	1.14212	PRSS2;CTRB1
Erythroid-like and erythroid precursor cells	1/70	0.550977	0.619849	1.88037	1.12082	CD44
Basophils	1/73	0.566251	0.624032	1.80128	1.02442	CD44
NK cells	1/80	0.599939	0.63523	1.63995	0.837897	IL32
Fibroblasts	2/171	0.581199	0.627695	1.28101	0.695157	VIM;CD44
Adipocytes	1/117	0.739647	0.765697	1.10929	0.334542	MT2A
Dendritic cells	1/121	0.751518	0.765697	1.07144	0.306068	FTL
Mast cells	1/142	0.805655	0.805655	0.907836	0.196184	CPA1

## Sheet: data S5
Data S5: enrich analysis of alpha cell
Term	Overlap	P-value	Adjusted P-value	Odds Ratio	Combined Score	Genes
Alpha cells	6/47	1.75415e-07	7.01658e-06	34.3574	534.468	SCGN;CHGA;GCG;ALDH1A1;MAFB;TTR
Enteroendocrine cells	5/48	5.9998e-06	0.000119996	26.3698	317.065	SCGN;CHGA;GCG;CHGB;CPE
Merkel cells	2/16	0.00363393	0.0363393	31.5811	177.405	CD99;CHGA
Beta cells	3/51	0.00292504	0.0363393	13.6969	79.9139	SCGN;INS;MAFB
GABAergic neurons	1/15	0.0830805	0.28128	18.1752	45.219	PARM1
Enteric glia cells	1/17	0.093644	0.28128	15.9647	37.8086	ALDH1A1
Embryonic stem cells	3/83	0.0114318	0.0914545	8.19034	36.6219	CD59;LMNA;ITGB1
Muller cells	2/51	0.0341499	0.216739	9.1758	30.9866	ITM2B;CLU
Leydig cells	2/54	0.0379293	0.216739	8.64539	28.288	MAFB;ALDH1A1
Choroid plexus cells	1/21	0.114422	0.28128	12.8377	27.8305	TTR
Clara cells	1/22	0.119544	0.28128	12.2378	25.9939	ALDH1A1
Transient cells	1/22	0.119544	0.28128	12.2378	25.9939	PARM1
Thymocytes	1/22	0.119544	0.28128	12.2378	25.9939	CD99
Sertoli cells	2/63	0.0501683	0.242351	7.36464	22.0377	CLU;MAFB
Chromaffin cells	1/25	0.134742	0.294213	10.7318	21.5107	CHGA
Gamma delta T cells	2/66	0.054529	0.242351	7.01715	20.4131	TUBB;TUBA1B
Erythroblasts	1/26	0.139751	0.294213	10.3085	20.2861	ITGB1
Microglia	2/71	0.0620855	0.248342	6.50467	18.078	MAFB;FOS
Gamma (PP) cells	1/29	0.154613	0.294502	9.21697	17.2065	SCGN
Pancreatic stellate cells	1/29	0.154613	0.294502	9.21697	17.2065	TIMP1
Anterior pituitary gland cells	1/33	0.174047	0.311022	8.07504	14.1187	CHGA
Delta cells	1/34	0.178838	0.311022	7.83217	13.4813	SCGN
Hematopoietic stem cells	2/88	0.0901788	0.28128	5.20539	12.524	CD59;ALDH1A1
Melanocytes	1/40	0.207028	0.334696	6.63317	10.4466	HSPB1
Bergmann glia	1/41	0.211635	0.334696	6.46788	10.0439	ITGB1
Trigeminal neurons	1/45	0.229808	0.334696	5.88099	8.64807	PARM1
Kupffer cells	1/45	0.229808	0.334696	5.88099	8.64807	FTL
Hepatic stellate cells	1/46	0.234287	0.334696	5.75039	8.34501	TIMP1
Osteoclasts	1/49	0.247578	0.335945	5.39091	7.52588	ITGB1
Neuroblasts	1/50	0.251958	0.335945	5.28077	7.27949	SCGN
Photoreceptor cells	1/53	0.264954	0.341876	4.97551	6.60847	CHGA
Plasma cells	1/86	0.394328	0.492911	3.03151	2.82103	SSR4
Podocytes	1/94	0.422228	0.500738	2.76689	2.38564	MAFB
T cells	1/95	0.425628	0.500738	2.73696	2.33789	CD81
Adipocytes	1/117	0.495736	0.563964	2.20855	1.54976	TIMP1
Dendritic cells	1/121	0.507567	0.563964	2.1332	1.44658	FTL
Epithelial cells	1/127	0.524816	0.567368	2.02912	1.30819	TTR
Hepatocytes	1/149	0.583231	0.613928	1.71944	0.927072	TTR
Neurons	1/203	0.698848	0.716767	1.2446	0.445966	RHBDD2
Interneurons	1/217	0.723369	0.723369	1.16015	0.3757	PARM1

## Sheet: data S6
Data S6: enrich analysis of beta cell
Term	Overlap	P-value	Adjusted P-value	Odds Ratio	Combined Score	Genes
Enteroendocrine cells	8/48	5.24241e-11	2.35908e-09	57.9598	1372	SCGN;CHGA;SST;PAX6;VEGFA;IAPP;CHGB;CPE
GABAergic neurons	2/15	0.00270177	0.0230836	37.1016	219.413	SST;PARM1
Alpha cells	4/47	9.17396e-05	0.00190107	22.6923	210.96	SCGN;PAX6;TTR;CHGA
Merkel cells	2/16	0.00307781	0.0230836	34.5349	199.734	CD99;CHGA
Beta cells	4/51	0.000126738	0.00190107	20.7619	186.305	IAPP;SCGN;INS;PAX6
Delta cells	3/34	0.000697774	0.00784996	23.2493	168.967	SST;SCGN;IAPP
Gamma (PP) cells	2/29	0.00998701	0.0642022	18.1543	83.6274	SCGN;PAX6
Retinal progenitor cells	1/13	0.0667901	0.248355	22.9787	62.1849	PAX6
Radial glia cells	1/14	0.0717471	0.248355	21.2716	56.0423	PAX6
Hepatic stellate cells	2/46	0.0241103	0.130547	11.1745	41.6265	TIMP1;VEGFA
Megakaryocytes	2/48	0.0261093	0.130547	10.6889	38.9661	VEGFA;CIB1
Muller cells	2/51	0.0292305	0.131537	10.0341	35.4457	ITM2B;VEGFA
Pluripotent stem cells	1/20	0.100964	0.273968	14.706	33.7206	NAP1L1
Choroid plexus cells	1/21	0.105748	0.273968	13.9854	31.4209	TTR
Transient cells	1/22	0.110506	0.273968	13.3318	29.3657	PARM1
Thymocytes	1/22	0.110506	0.273968	13.3318	29.3657	CD99
Chromaffin cells	1/25	0.124638	0.273968	11.6912	24.345	CHGA
Peritubular myoid cells	1/25	0.124638	0.273968	11.6912	24.345	RASD1
Gamma delta T cells	2/66	0.0468815	0.191788	7.67352	23.482	TUBB;TUBA1B
Erythroblasts	1/26	0.129301	0.273968	11.2301	22.9724	ITGB1
Neuroendocrine cells	1/27	0.13394	0.273968	10.8038	21.7195	SST
Pancreatic stellate cells	1/29	0.143147	0.28007	10.0409	19.5184	TIMP1
Anterior pituitary gland cells	1/33	0.16128	0.298361	8.79692	16.051	CHGA
Pulmonary alveolar type I cells	1/34	0.165756	0.298361	8.53234	15.3346	VEGFA
Immature neurons	1/38	0.183432	0.317478	7.61511	12.9146	PAX6
Bergmann glia	1/41	0.196453	0.327422	7.04609	11.4663	ITGB1
Kupffer cells	1/45	0.213506	0.331302	6.40674	9.8926	FTL
Trigeminal neurons	1/45	0.213506	0.331302	6.40674	9.8926	PARM1
Osteoclasts	1/49	0.230212	0.335302	5.87285	8.62578	ITGB1
Neuroblasts	1/50	0.234335	0.335302	5.75286	8.34742	SCGN
Chondrocytes	1/51	0.238437	0.335302	5.63762	8.08237	VEGFA
Photoreceptor cells	1/53	0.246579	0.336243	5.42032	7.58885	CHGA
Interneurons	3/217	0.104514	0.273968	3.26858	7.38186	PARM1;PAX6;SST
Mesangial cells	1/57	0.262612	0.347575	5.03186	6.72799	RASD1
Pericytes	1/62	0.282195	0.362822	4.61734	5.84167	VEGFA
Embryonic stem cells	1/83	0.359145	0.448931	3.42505	3.50736	ITGB1
Plasma cells	1/86	0.369471	0.449357	3.30253	3.28828	SSR4
Podocytes	1/94	0.396236	0.460967	3.01426	2.79044	VEGFA
T cells	1/95	0.399504	0.460967	2.98166	2.73576	CD81
Adipocytes	1/117	0.467267	0.525484	2.40601	1.83062	TIMP1
Dendritic cells	1/121	0.478775	0.525484	2.32393	1.71163	FTL
Epithelial cells	1/127	0.495591	0.527236	2.21054	1.55181	TTR
Platelets	1/130	0.503803	0.527236	2.15779	1.47931	VEGFA
Hepatocytes	1/149	0.552919	0.565486	1.87318	1.10994	TTR
Fibroblasts	1/171	0.603985	0.603985	1.62287	0.818264	VEGFA

## Sheet: data S7
Data S7: enrich analysis of delta cell
Term	Overlap	P-value	Adjusted P-value	Odds Ratio	Combined Score	Genes
Enteroendocrine cells	6/48	1.15753e-07	4.63013e-06	37.3919	597.217	SCGN;CHGA;SST;GCG;CHGB;CPE
Alpha cells	4/47	9.17396e-05	0.00183479	22.6923	210.96	GCG;SCGN;TTR;CHGA
Merkel cells	2/16	0.00307781	0.0410374	34.5349	199.734	CD99;CHGA
Delta cells	2/34	0.0135802	0.135802	15.3435	65.9638	SST;SCGN
GABAergic neurons	1/15	0.076679	0.288569	19.8	50.8489	SST
Epiblast cells	1/17	0.0864675	0.288569	17.3919	42.5752	EPCAM
Muller cells	2/51	0.0292305	0.19487	10.0341	35.4457	ITM2B;CLU
Beta cells	2/51	0.0292305	0.19487	10.0341	35.4457	SCGN;INS
Choroid plexus cells	1/21	0.105748	0.288569	13.9854	31.4209	TTR
Thymocytes	1/22	0.110506	0.288569	13.3318	29.3657	CD99
Chromaffin cells	1/25	0.124638	0.288569	11.6912	24.345	CHGA
Gamma delta T cells	2/66	0.0468815	0.267894	7.67352	23.482	TUBB;TUBA1B
Erythroblasts	1/26	0.129301	0.288569	11.2301	22.9724	ITGB1
Neuroendocrine cells	1/27	0.13394	0.288569	10.8038	21.7195	SST
Pancreatic stellate cells	1/29	0.143147	0.288569	10.0409	19.5184	TIMP1
Langerhans cells	1/29	0.143147	0.288569	10.0409	19.5184	EPCAM
Gamma (PP) cells	1/29	0.143147	0.288569	10.0409	19.5184	SCGN
Anterior pituitary gland cells	1/33	0.16128	0.302368	8.79692	16.051	CHGA
Embryonic stem cells	2/83	0.0704724	0.288569	6.04865	16.0443	ITGB1;EPCAM
Melanocytes	1/40	0.192135	0.302368	7.22616	11.92	HSPB1
Bergmann glia	1/41	0.196453	0.302368	7.04609	11.4663	ITGB1
Cholangiocytes	1/42	0.200749	0.302368	6.8747	11.0387	EPCAM
Kupffer cells	1/45	0.213506	0.302368	6.40674	9.8926	FTL
Epsilon cells	1/45	0.213506	0.302368	6.40674	9.8926	S100A6
Hepatic stellate cells	1/46	0.217715	0.302368	6.26447	9.55063	TIMP1
Luminal epithelial cells	1/48	0.226068	0.302368	5.99789	8.9184	SERPINA1
Osteoclasts	1/49	0.230212	0.302368	5.87285	8.62578	ITGB1
Neuroblasts	1/50	0.234335	0.302368	5.75286	8.34742	SCGN
Dendritic cells	2/121	0.133401	0.288569	4.08826	8.23537	SERPINA1;FTL
Photoreceptor cells	1/53	0.246579	0.308223	5.42032	7.58885	CHGA
Epithelial cells	2/127	0.144284	0.288569	3.88724	7.52558	TTR;EPCAM
Neural stem/precursor cells	1/57	0.262612	0.318317	5.03186	6.72799	S100A6
Sertoli cells	1/63	0.286051	0.336531	4.5424	5.68519	CLU
Hepatocytes	2/149	0.185675	0.302368	3.29011	5.53974	SERPINA1;TTR
Microglia	1/71	0.316198	0.361369	4.01939	4.62787	FOS
Plasma cells	1/86	0.369471	0.410523	3.30253	3.28828	SSR4
T cells	1/95	0.399504	0.431897	2.98166	2.73576	CD81
Monocytes	1/99	0.412409	0.434114	2.85787	2.53133	SERPINA1
Adipocytes	1/117	0.467267	0.479249	2.40601	1.83062	TIMP1
Interneurons	1/217	0.69333	0.69333	1.2639	0.4629	SST

## Sheet: data S8
Data S8: enrich analysis of ductal cell
Term	Overlap	P-value	Adjusted P-value	Odds Ratio	Combined Score	Genes
Cholangiocytes	8/42	5.72673e-10	3.20697e-08	39.7503	845.915	CLDN4;KRT7;LCN2;ELF3;EPCAM;TACSTD2;CD24;KRT19
Luminal epithelial cells	6/48	1.40699e-06	3.93957e-05	22.9009	308.568	CLDN4;KRT18;LCN2;HMGA1;KRT19;KRT8
Ductal cells	5/43	1.68604e-05	0.000236046	20.6852	227.342	CLDN4;S100A10;KRT7;TACSTD2;KRT19
Mammary epithelial cells	5/43	1.68604e-05	0.000236046	20.6852	227.342	CLDN4;KRT18;KRT7;KRT19;KRT8
Merkel cells	2/16	0.00666543	0.0467741	22.7878	114.186	KRT18;KRT8
Epiblast cells	2/17	0.00751727	0.0467741	21.3127	104.231	CLDN7;EPCAM
Hepatoblasts	2/17	0.00751727	0.0467741	21.3127	104.231	KRT18;KRT8
Embryonic stem cells	5/83	0.000406561	0.00455348	10.05	78.468	EPCAM;CD59;LMNA;CD24;ITGB1
Principal cells	3/42	0.00408652	0.0381408	12.0127	66.0704	TACSTD2;CLDN4;LGALS3
Erythroblasts	2/26	0.0171916	0.0875207	13.4553	54.6732	ITGB1;CD44
Decidual cells	1/10	0.0756614	0.282469	20.2694	52.3253	IL32
Parietal cells	1/14	0.104344	0.343721	14.2504	32.2069	CD24
Epsilon cells	2/45	0.047757	0.222866	7.54465	22.948	KRT8;S100A6
Keratinocytes	2/48	0.0536321	0.231031	7.05294	20.6341	LCN2;CD24
Epithelial cells	4/127	0.0164062	0.0875207	5.00146	20.5565	CD24;KRT7;ELF3;EPCAM
Pluripotent stem cells	1/20	0.145754	0.40535	9.85189	18.9731	NAP1L1
Muller cells	2/51	0.0597516	0.239006	6.62082	18.6546	ITM2B;CD44
Natural killer T cells	1/23	0.165756	0.40535	8.53234	15.3346	CD44
Sebocytes	1/25	0.178838	0.40535	7.83217	13.4813	KRT7
Neutrophils	2/69	0.100858	0.343721	4.83476	11.0911	LCN2;CD24
Langerhans cells	1/29	0.204406	0.427754	6.72663	10.6795	EPCAM
Microfold cells	1/30	0.210676	0.427754	6.49709	10.1188	CTSD
Trophoblast cells	1/31	0.216899	0.427754	6.2826	9.60186	KRT7
Tuft cells	1/33	0.229201	0.427754	5.89323	8.68164	KLF6
Pulmonary alveolar type I cells	1/34	0.235281	0.427754	5.71597	8.27086	KRT7
Goblet cells	1/35	0.241315	0.427754	5.54899	7.88873	KRT7
Plasma cells	2/86	0.14495	0.40535	3.84661	7.4292	CD24;SSR4
Hematopoietic stem cells	2/88	0.150384	0.40535	3.75589	7.11577	CD59;CD44
Melanocytes	1/40	0.270799	0.455512	4.84092	6.32408	HSPB1
T cells	2/95	0.169719	0.40535	3.46894	6.15255	IL32;CD81
Bergmann glia	1/41	0.276561	0.455512	4.72029	6.06711	ITGB1
B cells	2/98	0.178138	0.40535	3.35871	5.79443	CD24;HMGA1
Monocytes	2/99	0.18096	0.40535	3.32347	5.68141	CD44;IFITM3
Kupffer cells	1/45	0.299169	0.461944	4.29197	5.17932	FTL
Megakaryocytes	1/48	0.315674	0.461944	4.01807	4.63302	CIB1
Osteoclasts	1/49	0.321091	0.461944	3.9343	4.46948	ITGB1
Chondrocytes	1/51	0.331801	0.461944	3.77671	4.16654	LCN2
Mesothelial cells	1/53	0.342347	0.461944	3.63113	3.89232	KRT7
Loop of Henle cells	1/53	0.342347	0.461944	3.63113	3.89232	LCN2
Dendritic cells	2/121	0.244431	0.427754	2.69746	3.80024	FTL;LGALS3
Leydig cells	1/54	0.347559	0.461944	3.56242	3.76484	LCN2
Ependymal cells	1/56	0.357863	0.461944	3.43243	3.52718	TM4SF1
Neural stem/precursor cells	1/57	0.362956	0.461944	3.37089	3.41631	S100A6
Mesangial cells	1/57	0.362956	0.461944	3.37089	3.41631	CSTB
Astrocytes	1/63	0.392699	0.467897	3.04299	2.84431	LCN2
Osteoblasts	1/63	0.392699	0.467897	3.04299	2.84431	CD44
Gamma delta T cells	1/66	0.407061	0.473094	2.90156	2.6079	TUBB
Erythroid-like and erythroid precursor cells	1/70	0.425698	0.473094	2.73199	2.33319	CD44
Microglia	1/71	0.430268	0.473094	2.6926	2.2708	FOS
Basophils	1/73	0.439301	0.473094	2.61709	2.15274	CD44
NK cells	1/80	0.469838	0.496432	2.38271	1.79982	IL32
Fibroblasts	2/171	0.389622	0.467897	1.87906	1.77116	KLF6;CD44
Endothelial cells	2/187	0.434066	0.473094	1.71035	1.42739	S100A10;TM4SF1
Podocytes	1/94	0.526143	0.54563	2.01924	1.29672	LCN2
Macrophages	1/128	0.639794	0.651427	1.46883	0.655994	LGALS3
Enterocytes	1/142	0.678463	0.678463	1.31908	0.511703	ELF3

## Sheet: data S9
Data S9: enrich analysis of endothelial cell
Term	Overlap	P-value	Adjusted P-value	Odds Ratio	Combined Score	Genes
Endothelial cells	12/187	2.06011e-08	1.15366e-06	11.5399	204.232	PODXL;KDR;ID3;ENG;CD9;IGFBP7;PECAM1;CD93;PLVAP;TM4SF1;SPARC;ETS1
Erythroblasts	3/26	0.00129346	0.0181085	18.4918	122.979	ETS1;ITGB1;ENG
Embryonic stem cells	5/83	0.000608908	0.0129651	9.11583	67.4921	CD9;PECAM1;CD59;PODXL;ITGB1
Thymocytes	2/22	0.0146572	0.0990445	14.7252	62.1818	CXCR4;CD99
Platelets	6/130	0.000694557	0.0129651	6.93217	50.4124	CD9;CXCR4;PECAM1;SERPINE1;SPARC;GPX1
Hepatic stellate cells	3/46	0.00671799	0.0706126	9.9432	49.7455	SPARC;TIMP1;IGFBP7
Decidual cells	1/10	0.0820834	0.25537	18.5905	46.4766	IL32
Megakaryocytes	3/48	0.00756564	0.0706126	9.50167	46.4075	CD9;CXCR4;PECAM1
Pancreatic stellate cells	2/29	0.0248185	0.123435	10.959	40.5064	SPARC;TIMP1
Microfold cells	2/30	0.0264503	0.123435	10.572	38.4028	MARCKSL1;CTSD
Pericytes	3/62	0.0152482	0.0990445	7.24211	30.2959	IFITM1;VIM;PECAM1
Astrocytes	3/63	0.0159179	0.0990445	7.12073	29.4821	VIM;SOCS3;ETS1
Parietal cells	1/14	0.113047	0.299007	13.07	28.4919	PODXL
Gamma delta T cells	3/66	0.0180257	0.100944	6.77953	27.2263	TUBB;TUBA1B;IFITM1
Pancreatic progenitor cells	1/15	0.120628	0.299007	12.1658	25.7312	CXCR4
GABAergic neurons	1/15	0.120628	0.299007	12.1658	25.7312	SST
Merkel cells	1/16	0.128146	0.299007	11.3783	23.3776	CD99
Bergmann glia	2/41	0.0470385	0.17561	7.60831	23.257	ITGB1;VIM
Plasma cells	3/86	0.0359054	0.15467	5.13139	17.0714	CD9;CXCR4;CD93
Muller cells	2/51	0.0693878	0.228572	6.05705	16.1605	ITM2B;GNAI2
T cells	3/95	0.0461062	0.17561	4.62225	14.2218	IL32;CD81;CXCR4
Natural killer T cells	1/23	0.179047	0.371356	7.82557	13.4608	CXCR4
Monocytes	3/99	0.0510575	0.178701	4.42645	13.1678	CXCR4;PECAM1;IFITM3
Chromaffin cells	1/25	0.193051	0.386102	7.18339	11.8153	SERPINE1
Osteoblasts	2/63	0.0998181	0.294201	4.86145	11.2027	ITGA5;SOCS3
Neuroendocrine cells	1/27	0.206822	0.398761	6.63815	10.461	SST
Glomus cells	1/28	0.213622	0.398761	6.39527	9.8714	VIM
Basophils	2/73	0.127514	0.299007	4.17167	8.59167	IGFBP7;IFITM1
Trophoblast cells	1/31	0.233683	0.422136	5.76218	8.37701	SERPINE1
NK cells	2/80	0.147877	0.331245	3.7934	7.25059	IL32;CXCR4
Delta cells	1/34	0.253245	0.44063	5.24249	7.20002	SST
Stromal cells	1/35	0.259657	0.44063	5.08934	6.86243	PECAM1
Hematopoietic stem cells	2/88	0.171912	0.370271	3.43605	6.05011	CD59;CXCR4
Melanocytes	1/40	0.290923	0.465476	4.43992	5.48195	HSPB1
Satellite cells	1/43	0.309061	0.480762	4.12361	4.842	CXCR4
Kupffer cells	1/45	0.320902	0.481592	3.93643	4.47422	FTL
Enteroendocrine cells	1/48	0.338294	0.481592	3.68522	3.99419	SST
Luminal epithelial cells	1/48	0.338294	0.481592	3.68522	3.99419	CD9
Osteoclasts	1/49	0.343994	0.481592	3.60839	3.85062	ITGB1
Beta cells	1/51	0.355252	0.485223	3.46385	3.58484	INS
Dendritic cells	2/121	0.27573	0.454144	2.46774	3.17926	FTL;CXCR4
Plasmacytoid dendritic cells	1/55	0.377207	0.493703	3.20661	3.12632	CXCR4
Ependymal cells	1/56	0.382581	0.493703	3.14809	3.02474	TM4SF1
Mesangial cells	1/57	0.387909	0.493703	3.09165	2.92774	CSTB
T helper cells	1/60	0.403629	0.502293	2.93369	2.66162	CXCR4
Neutrophils	1/69	0.448466	0.534343	2.54285	2.03916	PECAM1
Fibroblasts	2/171	0.431349	0.525121	1.71902	1.44541	SPARC;VIM
Myocytes	1/88	0.532615	0.613347	1.98176	1.24842	CXCR4
Endothelial cells (aorta)	1/89	0.536679	0.613347	1.9589	1.21913	ITGA5
Podocytes	1/94	0.55649	0.623269	1.85195	1.08544	PODXL
B cells	1/98	0.571743	0.627796	1.77429	0.991945	CXCR4
Cardiomyocytes	1/104	0.593669	0.639336	1.66905	0.870297	CXCR4
Adipocytes	1/117	0.637496	0.67358	1.47822	0.665505	TIMP1
Epithelial cells	1/127	0.668044	0.692786	1.35811	0.547865	ITGA5
Mast cells	1/142	0.709222	0.722117	1.20979	0.415667	CXCR4
Interneurons	1/217	0.851121	0.851121	0.776456	0.125166	SST

## Sheet: data S10
Data S10: enrich analysis of epsilon cell
Term	Overlap	P-value	Adjusted P-value	Odds Ratio	Combined Score	Genes
Enteroendocrine cells	6/48	3.28292e-07	1.37883e-05	30.4068	453.955	SCGN;SST;GHRL;IAPP;CHGB;CPE
Epsilon cells	4/45	0.000148394	0.00311626	19.728	173.915	KRT8;ACSL1;GHRL;S100A6
Merkel cells	2/16	0.00423348	0.0355612	29.0906	158.972	CD99;KRT8
Delta cells	3/34	0.00112805	0.0157927	19.4354	131.913	SST;SCGN;IAPP
Beta cells	3/51	0.00365897	0.0355612	12.5729	70.5412	SCGN;INS;IAPP
GABAergic neurons	1/15	0.0894406	0.325556	16.7957	40.5479	SST
Epiblast cells	1/17	0.100767	0.325556	14.753	33.8573	EPCAM
Hepatoblasts	1/17	0.100767	0.325556	14.753	33.8573	KRT8
Embryonic stem cells	3/83	0.0141461	0.099023	7.51819	32.0148	CD59;ITGB1;EPCAM
Alpha cells	2/47	0.0338871	0.179938	9.20384	31.1524	SCGN;TTR
Luminal epithelial cells	2/48	0.0352267	0.179938	9.0038	30.1263	SERPINA1;KRT8
Muller cells	2/51	0.0393675	0.179938	8.45217	27.3412	ITM2B;CLU
Choroid plexus cells	1/21	0.123015	0.32944	11.8633	24.8589	TTR
Thymocytes	1/22	0.128494	0.32944	11.3089	23.2044	CD99
Erythroblasts	1/26	0.150081	0.32944	9.52608	18.067	ITGB1
Neuroendocrine cells	1/27	0.155396	0.32944	9.16447	17.0622	SST
Gamma (PP) cells	1/29	0.165932	0.32944	8.51738	15.2987	SCGN
Pancreatic stellate cells	1/29	0.165932	0.32944	8.51738	15.2987	TIMP1
Langerhans cells	1/29	0.165932	0.32944	8.51738	15.2987	EPCAM
Epithelial cells	3/127	0.0428423	0.179938	4.81067	15.1547	TSTD1;TTR;EPCAM
Melanocytes	1/40	0.221653	0.362818	6.12969	9.23525	HSPB1
Bergmann glia	1/41	0.226537	0.362818	5.97694	8.87485	ITGB1
Cholangiocytes	1/42	0.231391	0.362818	5.83155	8.53533	EPCAM
Mammary epithelial cells	1/43	0.236216	0.362818	5.69301	8.21506	KRT8
Kupffer cells	1/45	0.245779	0.362818	5.4346	7.6265	FTL
Hepatic stellate cells	1/46	0.250517	0.362818	5.31391	7.35567	TIMP1
Osteoclasts	1/49	0.26456	0.364701	4.98172	6.62413	ITGB1
Adipocytes	2/117	0.163695	0.32944	3.56634	6.45417	TIMP1;ACSL1
Neuroblasts	1/50	0.269184	0.364701	4.87993	6.40423	SCGN
Dendritic cells	2/121	0.172564	0.32944	3.44368	6.05051	SERPINA1;FTL
Plasmacytoid dendritic cells	1/55	0.291889	0.38281	4.42704	5.45138	ITM2C
Neural stem/precursor cells	1/57	0.300779	0.38281	4.26833	5.12788	S100A6
Sertoli cells	1/63	0.32681	0.403707	3.85313	4.30925	CLU
Hepatocytes	2/149	0.236517	0.362818	2.77135	3.99555	SERPINA1;TTR
Gamma delta T cells	1/66	0.339473	0.407368	3.67406	3.96931	TUBA1B
Plasma cells	1/86	0.418217	0.483084	2.80139	2.44213	SSR4
Hematopoietic stem cells	1/88	0.425574	0.483084	2.73606	2.33746	CD59
T cells	1/95	0.450626	0.49806	2.5292	2.01607	CD81
Monocytes	1/99	0.464465	0.500193	2.42419	1.85904	SERPINA1
Olfactory epithelial cells	1/131	0.563721	0.591907	1.81588	1.04085	TSTD1
Fibroblasts	1/171	0.663081	0.679253	1.37658	0.565582	P4HTM
Interneurons	1/217	0.750477	0.750477	1.07207	0.307734	SST

## Sheet: data S11
Data S11: enrich analysis of gamma cell
Term	Overlap	P-value	Adjusted P-value	Odds Ratio	Combined Score	Genes
Gamma (PP) cells	5/29	1.17356e-06	3.28598e-05	37.7627	515.667	SCGN;FXYD2;PAX6;PPY;AQP3
Enteroendocrine cells	6/48	6.42259e-07	3.28598e-05	26.6648	380.194	SCGN;CHGA;SST;PAX6;CHGB;CPE
Merkel cells	3/16	0.000156824	0.00219553	40.5434	355.176	ID2;CD99;CHGA
Alpha cells	5/47	1.38983e-05	0.000259434	21.6777	242.438	SCGN;CHGA;PAX6;ALDH1A1;TTR
GABAergic neurons	2/15	0.00458093	0.0366474	27.9435	150.499	SST;PARM1
Beta cells	4/51	0.000369144	0.00413441	15.2526	120.562	SCGN;FXYD2;INS;PAX6
Delta cells	3/34	0.00154085	0.0143813	17.303	112.044	SST;FXYD2;SCGN
Retinal progenitor cells	1/13	0.0862849	0.374558	17.4976	42.871	PAX6
Radial glia cells	1/14	0.0926155	0.374558	16.1977	38.5393	PAX6
Enteric glia cells	1/17	0.111354	0.374558	13.2435	29.0699	ALDH1A1
Muller cells	2/51	0.0477182	0.334028	7.55715	22.9922	ITM2B;CLU
Pluripotent stem cells	1/20	0.129718	0.374558	11.1982	22.8711	NAP1L1
Choroid plexus cells	1/21	0.135757	0.374558	10.6494	21.2657	TTR
Transient cells	1/22	0.141756	0.374558	10.1518	19.8329	PARM1
Clara cells	1/22	0.141756	0.374558	10.1518	19.8329	ALDH1A1
Thymocytes	1/22	0.141756	0.374558	10.1518	19.8329	CD99
Chromaffin cells	1/25	0.159512	0.374558	8.90246	16.3416	CHGA
Peritubular myoid cells	1/25	0.159512	0.374558	8.90246	16.3416	RASD1
Intercalated cells	1/25	0.159512	0.374558	8.90246	16.3416	FXYD2
Erythroblasts	1/26	0.165352	0.374558	8.55135	15.3897	ITGB1
Neuroendocrine cells	1/27	0.171152	0.374558	8.22673	14.5219	SST
Pancreatic stellate cells	1/29	0.182636	0.374558	7.64585	12.9999	TIMP1
Anterior pituitary gland cells	1/33	0.205144	0.374558	6.69857	10.6108	CHGA
Pulmonary alveolar type I cells	1/34	0.210676	0.374558	6.49709	10.1188	AQP3
Embryonic stem cells	2/83	0.111346	0.374558	4.55548	9.99979	CD59;ITGB1
Goblet cells	1/35	0.216172	0.374558	6.3073	9.66077	AQP3
Hematopoietic stem cells	2/88	0.122671	0.374558	4.28709	8.99539	CD59;ALDH1A1
Immature neurons	1/38	0.232437	0.374558	5.79864	8.46101	PAX6
Melanocytes	1/40	0.243099	0.374558	5.50247	7.78207	HSPB1
Bergmann glia	1/41	0.248376	0.374558	5.36535	7.47293	ITGB1
Distal tubule cells	1/42	0.253617	0.374558	5.23484	7.18183	FXYD2
Cholangiocytes	1/42	0.253617	0.374558	5.23484	7.18183	FXYD2
Principal cells	1/42	0.253617	0.374558	5.23484	7.18183	AQP3
Kupffer cells	1/45	0.26913	0.374558	4.8785	6.40332	FTL
Epsilon cells	1/45	0.26913	0.374558	4.8785	6.40332	S100A6
Trigeminal neurons	1/45	0.26913	0.374558	4.8785	6.40332	PARM1
Hepatic stellate cells	1/46	0.274232	0.374558	4.77016	6.17155	TIMP1
Keratinocytes	1/48	0.284332	0.374558	4.56717	5.74374	AQP3
Luminal epithelial cells	1/48	0.284332	0.374558	4.56717	5.74374	AQP3
Osteoclasts	1/49	0.289331	0.374558	4.47196	5.54605	ITGB1
Neuroblasts	1/50	0.294296	0.374558	4.38059	5.3582	SCGN
Photoreceptor cells	1/53	0.308991	0.382045	4.12736	4.84736	CHGA
Leydig cells	1/54	0.313823	0.382045	4.04926	4.6928	ALDH1A1
Epithelial cells	2/127	0.218317	0.374558	2.92759	4.45523	AQP3;TTR
Mesangial cells	1/57	0.328124	0.382812	3.83156	4.26975	RASD1
Neural stem/precursor cells	1/57	0.328124	0.382812	3.83156	4.26975	S100A6
Interneurons	3/217	0.187071	0.374558	2.43242	4.07739	PARM1;PAX6;SST
Sertoli cells	1/63	0.355868	0.406706	3.45885	3.57367	CLU
Gamma delta T cells	1/66	0.369321	0.41364	3.2981	3.2852	TUBA1B
Hepatocytes	2/149	0.275142	0.374558	2.47785	3.19758	AQP3;TTR
Microglia	1/71	0.391142	0.429489	3.06058	2.87292	FOS
Plasma cells	1/86	0.452314	0.487107	2.51472	1.99513	SSR4
T cells	1/95	0.486118	0.513635	2.27038	1.63763	CD81
Adipocytes	1/117	0.560479	0.581237	1.83204	1.06068	TIMP1
Dendritic cells	1/121	0.572831	0.583246	1.76953	0.985921	FTL
Neurons	1/203	0.763314	0.763314	1.03239	0.278834	RHBDD2

## Sheet: data S12
Data S12: enrich analysis of mast cell
Term	Overlap	P-value	Adjusted P-value	Odds Ratio	Combined Score	Genes
Muller cells	5/51	3.38571e-05	0.00179442	17.6984	182.176	GLUL;CD44;ITM2B;CLU;KIT
Myeloid-derived suppressor cells	2/15	0.00552714	0.048823	25.2646	131.327	S100A4;IL4R
Basophils	5/73	0.000192221	0.00509385	11.9522	102.274	IL4R;CD44;MS4A2;CPA3;GATA2
B cells naive	4/69	0.00168737	0.0298102	9.88731	63.1264	CD37;CD22;IL4R;FOXP1
Erythroblasts	2/26	0.0162396	0.0956332	13.8856	57.2131	KIT;CD44
Microfold cells	2/30	0.0213296	0.113047	11.9256	45.8858	CTSD;RAC2
Platelets	5/130	0.0026913	0.0356598	6.43608	38.087	ARHGDIB;CD9;LAPTM5;ALOX5AP;SRGN
Mast cells	5/142	0.00394798	0.0418485	5.85754	32.4189	KIT;RGS1;TPSAB1;MS4A2;CPA3
GABAergic neurons	1/15	0.108275	0.317408	13.6759	30.4026	SST
Merkel cells	1/16	0.115074	0.317408	12.7906	27.6555	CD99
Dendritic cells	4/121	0.0125639	0.0951267	5.44414	23.8286	KIT;FTL;S100A4;CD22
Cardiac stem and precursor cells	1/18	0.128522	0.317408	11.3235	23.232	KIT
Megakaryocytes	2/48	0.0508281	0.207222	7.27855	21.685	CD9;GATA2
Macrophages	4/128	0.0151998	0.0956332	5.12947	21.4744	S100A4;TYROBP;RGS1;SAMSN1
Hematopoietic stem cells	3/88	0.0283072	0.136389	5.67127	20.216	KIT;GATA2;CD44
Pluripotent stem cells	1/20	0.141772	0.317408	10.1574	19.8429	GATA2
Thymocytes	1/22	0.154826	0.317408	9.20823	17.1775	CD99
Monocytes	3/99	0.0382501	0.168938	5.01172	16.3563	RGS1;S100A4;CD44
Alveolar macrophages	1/23	0.16128	0.317408	8.79692	16.051	S100A4
Natural killer T cells	1/23	0.16128	0.317408	8.79692	16.051	CD44
Satellite glial cells	1/24	0.167687	0.317408	8.42062	15.0363	GLUL
B cells memory	2/66	0.088887	0.317408	5.22518	12.647	CD37;CD22
Eosinophils	1/27	0.186625	0.3297	7.46212	12.5263	CPA3
Neuroendocrine cells	1/27	0.186625	0.3297	7.46212	12.5263	SST
Glomus cells	1/28	0.192844	0.3297	7.18909	11.8324	VIM
Erythroid-like and erythroid precursor cells	2/70	0.0982397	0.317408	4.91542	11.4055	KIT;CD44
Tuft cells	1/33	0.223254	0.356015	6.07598	9.1106	RAC2
NK cells	2/80	0.122751	0.317408	4.27914	8.9759	KIT;S100A4
Delta cells	1/34	0.229201	0.356015	5.89323	8.68164	SST
Embryonic stem cells	2/83	0.13038	0.317408	4.11871	8.39104	KIT;CD9
Stromal cells	1/35	0.235104	0.356015	5.72107	8.28255	KIT
Plasma cells	2/86	0.138121	0.317408	3.96966	7.85846	CD37;CD9
T cells	2/95	0.161924	0.317408	3.57992	6.5177	CD81;S100A4
Bergmann glia	1/41	0.269613	0.394227	4.86667	6.37908	VIM
Paneth cells	1/42	0.275215	0.394227	4.74829	6.12625	IL4R
Fibroblasts	3/171	0.138767	0.317408	2.82118	5.57171	S100A4;VIM;CD44
Kupffer cells	1/45	0.291774	0.396514	4.42506	5.45068	FTL
Epsilon cells	1/45	0.291774	0.396514	4.42506	5.45068	S100A6
Luminal epithelial cells	1/48	0.307966	0.398103	4.14267	4.87909	CD9
Enteroendocrine cells	1/48	0.307966	0.398103	4.14267	4.87909	SST
Beta cells	1/51	0.323799	0.408604	3.89383	4.39081	INS
Neural stem/precursor cells	1/57	0.354418	0.432672	3.47543	3.60498	S100A6
Interneurons	3/217	0.226481	0.356015	2.19156	3.25468	SST;RGS10;GATA2
Pericytes	1/62	0.378903	0.432672	3.18912	3.09496	VIM
Astrocytes	1/63	0.38369	0.432672	3.13735	3.00533	VIM
Osteoblasts	1/63	0.38369	0.432672	3.13735	3.00533	CD44
Sertoli cells	1/63	0.38369	0.432672	3.13735	3.00533	CLU
Gamma delta T cells	1/66	0.39784	0.439282	2.99154	2.75732	TUBA1B
Neutrophils	1/69	0.411674	0.44418	2.85851	2.53699	S100A4
Endothelial cells	2/187	0.419037	0.44418	1.76507	1.53525	CD9;SRGN
B cells	1/98	0.530458	0.55126	1.99456	1.26458	CD22
Epithelial cells	1/127	0.62584	0.637876	1.52673	0.715515	GATA2
Hepatocytes	1/149	0.685379	0.685379	1.29371	0.488741	GLUL
